# Supplementary material for: 8-Hydroxyquinoline-Amino Acid Hybrids and Their Half-Sandwich Rh and Ru Complexes: Synthesis, Anticancer Activities, Solution Chemistry and Interaction with Biomolecules
Source: MDPI journal article supplement (doi:10.3390/ijms222011281), 2021-10-19
Supplement: s1 [file s1]

**8-Hydroxyquinoline-amino acid hybrids and their half-sandwich Rh and Ru complexes: synthesis, anticancer activities, solution chemistry and interaction with biomolecules**

Tamás Pivarcsik, Orsolya Dömötör, János P. Mészáros, Nóra V. May, Gabriella Spengler, Oszkár Csuvik, István Szatmári, Éva A. Enyedy

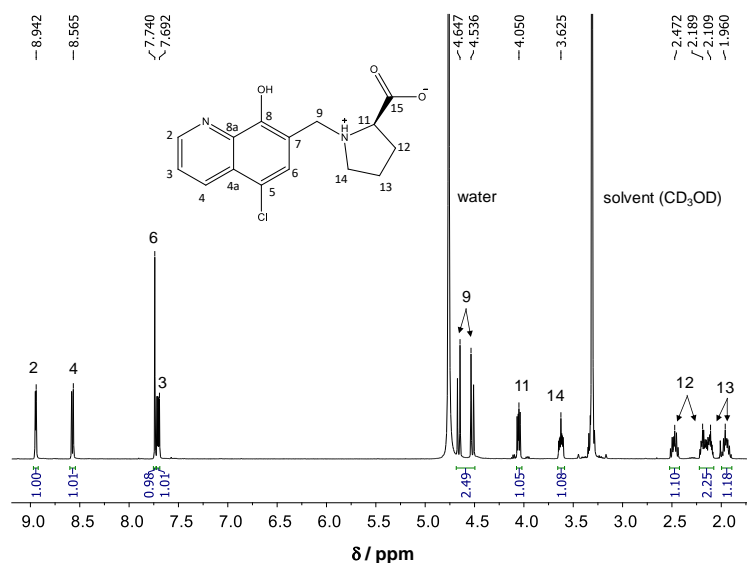

**Figure S1.**  $^1\text{H}$  NMR spectrum of HQCl-D-Pro in  $\text{CD}_3\text{OD}$ . Inserted structure shows numbering of peaks.  $\{c_{\text{HQCl-D-Pro}} = 10 \text{ mM}, T = 25.0^\circ\text{C}\}$

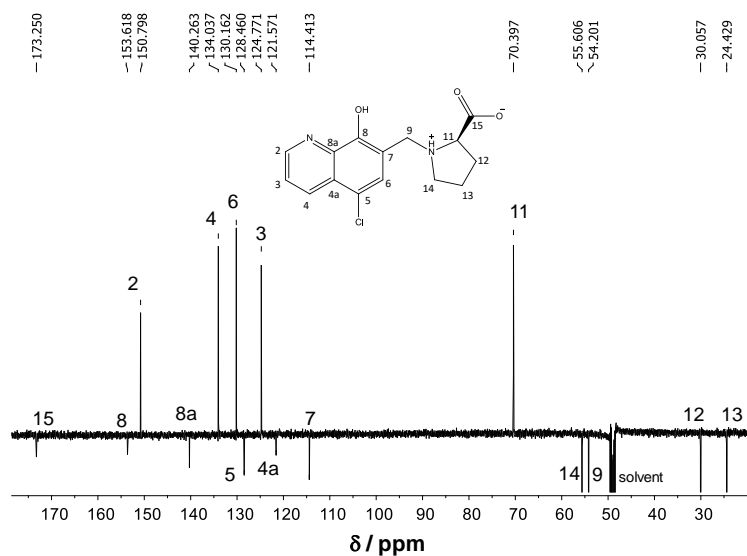

**Figure S2.**  $^{13}\text{C}$  APT NMR spectrum of HQCl-D-Pro in  $\text{CD}_3\text{OD}$ . Attached proton test method: CH and  $\text{CH}_3$  peaks are positive, C and  $\text{CH}_2$  peaks are negative. Inserted structure shows numbering of peaks.  $\{c_{\text{HQCl-D-Pro}} = 10 \text{ mM}, T = 25.0^\circ\text{C}\}$

# SUPPLEMENTARY INFORMATION

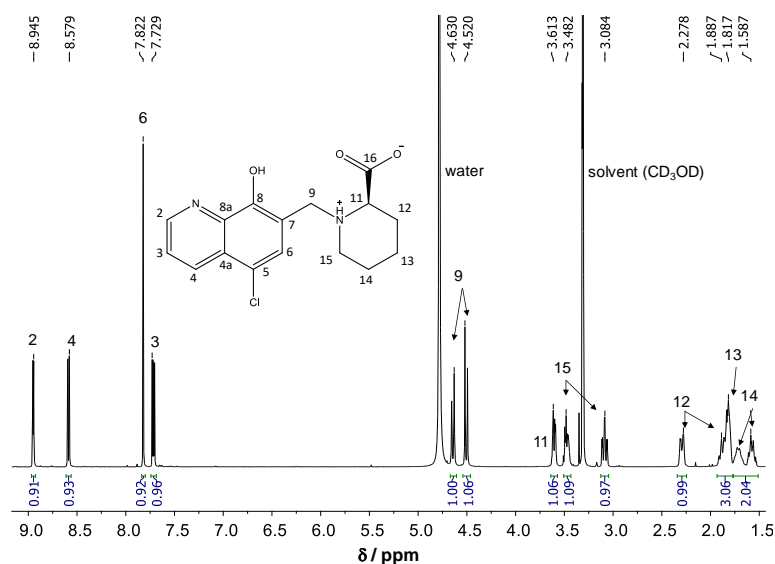

**Figure S3.** <sup>1</sup>H NMR spectrum of HQCl-D-hPro in CD<sub>3</sub>OD. Inserted structure shows numbering of peaks. {*c*<sub>HQCl-D-hPro</sub> = 10 mM, *T* = 25.0°C}

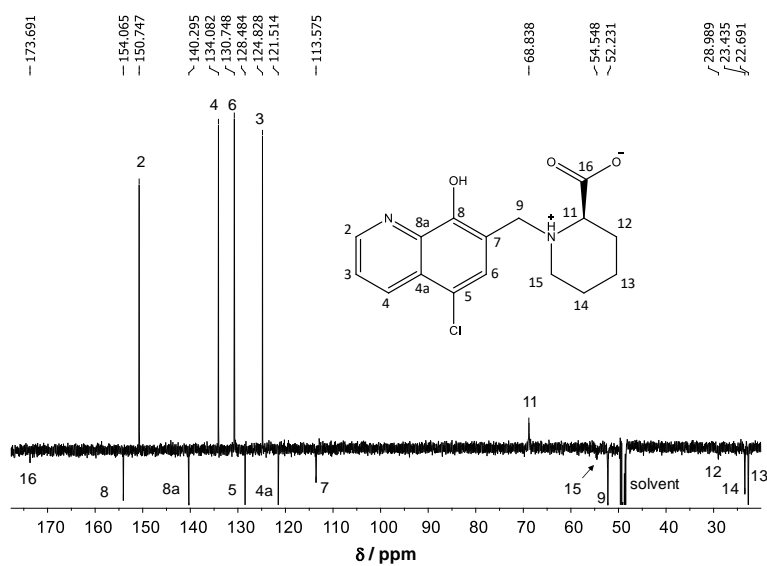

**Figure S4.** <sup>13</sup>C APT NMR spectrum of HQCl-D-hPro in CD<sub>3</sub>OD. Attached proton test method: CH and CH<sub>3</sub> peaks are positive, C and CH<sub>2</sub> peaks are negative. Inserted structure shows numbering of peaks. {*c*<sub>HQCl-D-hPro</sub> = 10 mM, *T* = 25.0°C}

# SUPPLEMENTARY INFORMATION

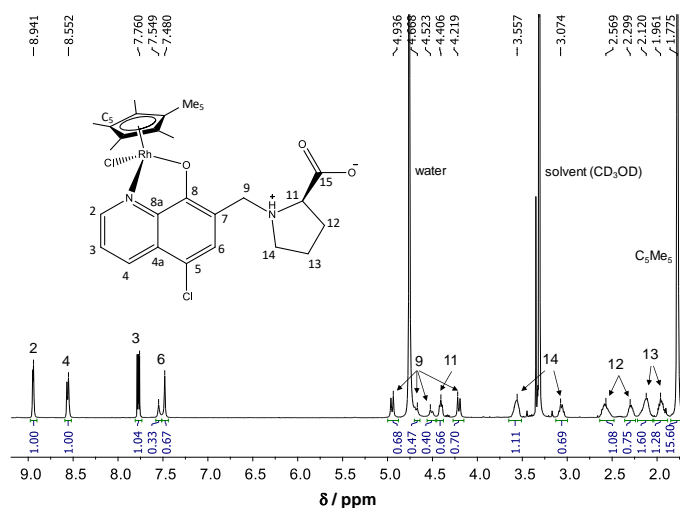

**Figure S5.**  $^1\text{H}$  NMR spectrum of  $[\text{Rh}(\eta^5\text{-C}_5\text{Me}_5)(\text{HQC1-D-Pro})\text{Cl}]\text{Cl}$  in  $\text{CD}_3\text{OD}$ . Inserted structure shows numbering of peaks.  $\{c_{\text{complex}} = 10 \text{ mM}, T = 25.0^\circ\text{C}\}$

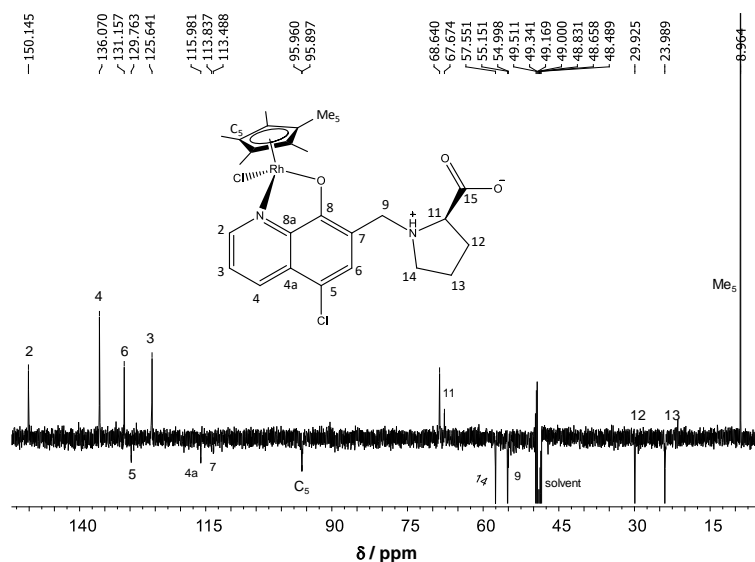

**Figure S6.**  $^{13}\text{C}$  APT NMR spectrum of  $[\text{Rh}(\eta^5\text{-C}_5\text{Me}_5)(\text{HQC1-D-Pro})\text{Cl}]\text{Cl}$  in  $\text{CD}_3\text{OD}$ . Attached proton test method: CH and  $\text{CH}_3$  peaks are positive, C and  $\text{CH}_2$  peaks are negative. Inserted structure shows numbering of peaks.  $\{c_{\text{complex}} = 10 \text{ mM}, T = 25.0^\circ\text{C}\}$

# SUPPLEMENTARY INFORMATION

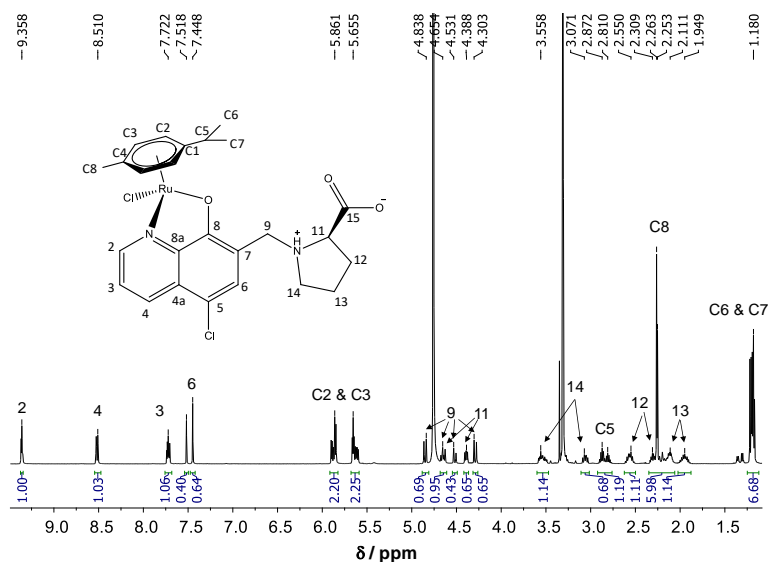

**Figure S7.**  $^1\text{H}$  NMR spectrum of  $[\text{Ru}(\eta^6\text{-}p\text{-cymene})(\text{HQCl-D-Pro})\text{Cl}]\text{Cl}$  in  $\text{CD}_3\text{OD}$ . Inserted structure shows numbering of peaks.  $\{c_{\text{complex}} = 10 \text{ mM}, T = 25.0^\circ\text{C}\}$

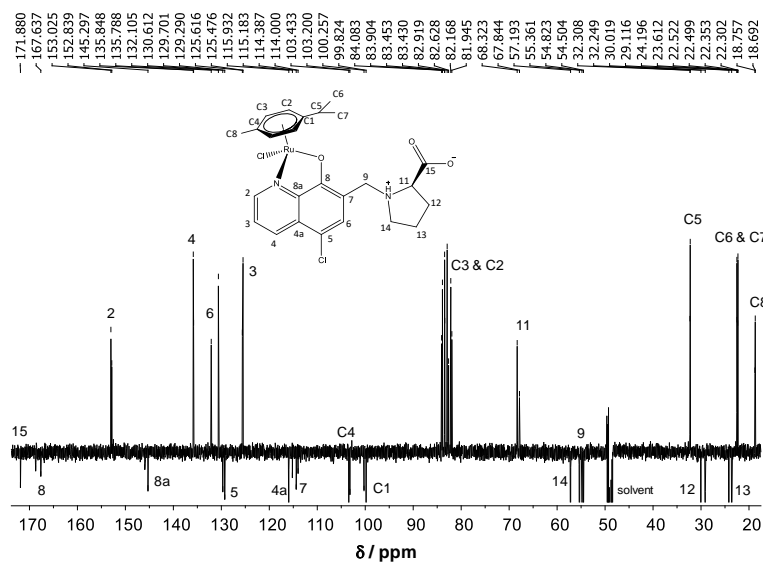

**Figure S8.**  $^{13}\text{C}$  APT NMR spectrum of  $[\text{Ru}(\eta^6\text{-}p\text{-cymene})(\text{HQCl-D-Pro})\text{Cl}]\text{Cl}$  in  $\text{CD}_3\text{OD}$ . Attached proton test method: CH and  $\text{CH}_3$  peaks are positive, C and  $\text{CH}_2$  peaks are negative. Inserted structure shows numbering of peaks.  $\{c_{\text{complex}} = 10 \text{ mM}, T = 25.0^\circ\text{C}\}$

# SUPPLEMENTARY INFORMATION

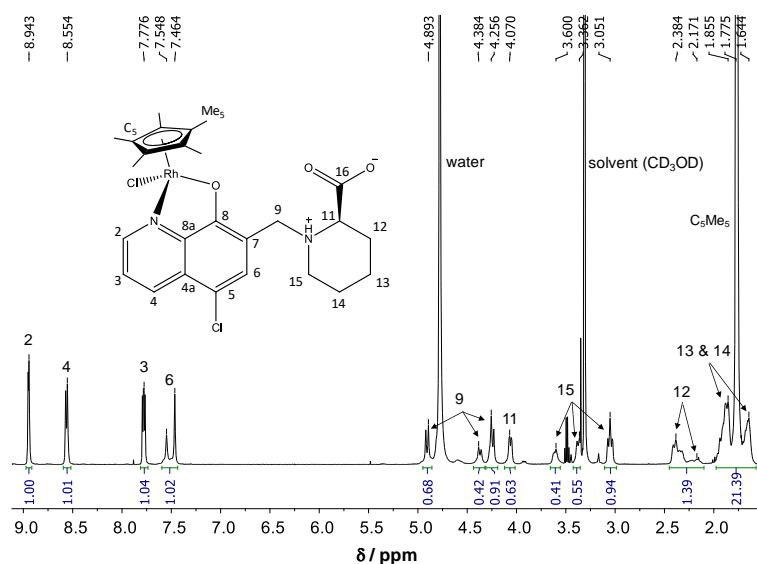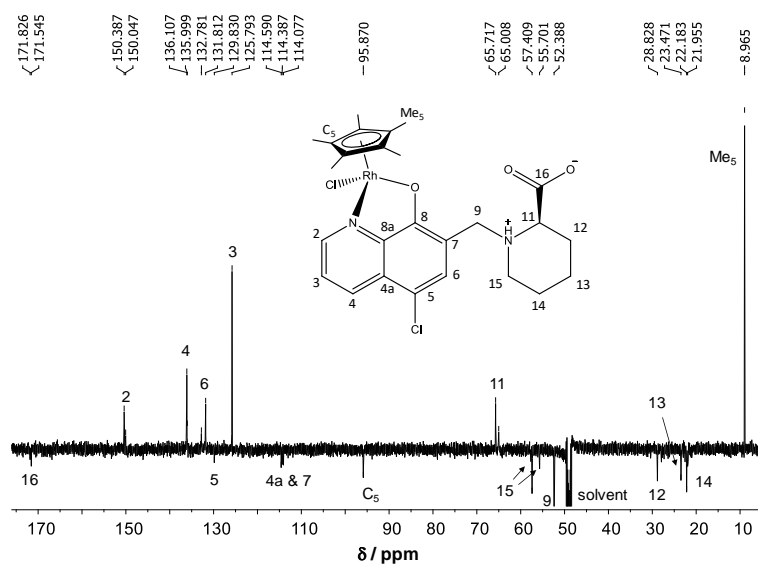

SUPPLEMENTARY INFORMATION

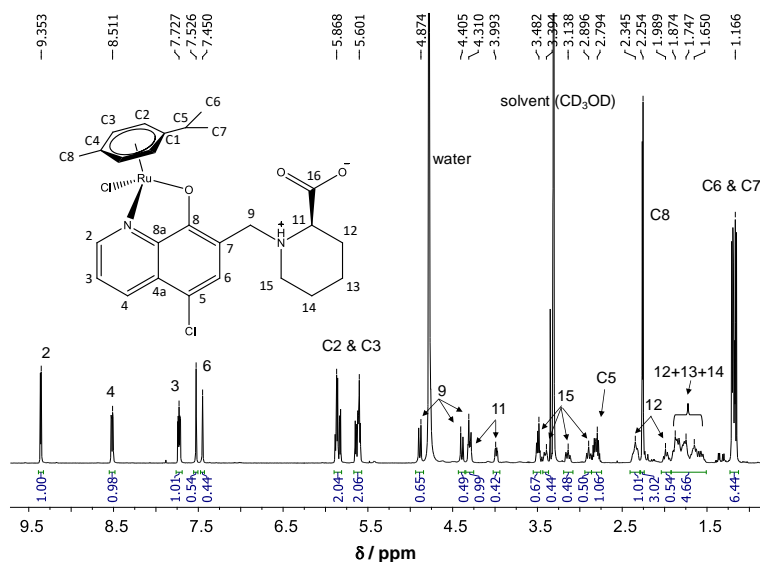

**Figure S11.**  $^1\text{H}$  NMR spectrum of  $[\text{Ru}(\eta^6\text{-}p\text{-cymene})(\text{HQCl-D-hPro})\text{Cl}]\text{Cl}$  in  $\text{CD}_3\text{OD}$ . Inserted structure shows numbering of peaks.  $\{c_{\text{complex}} = 10 \text{ mM}, T = 25.0^\circ\text{C}\}$

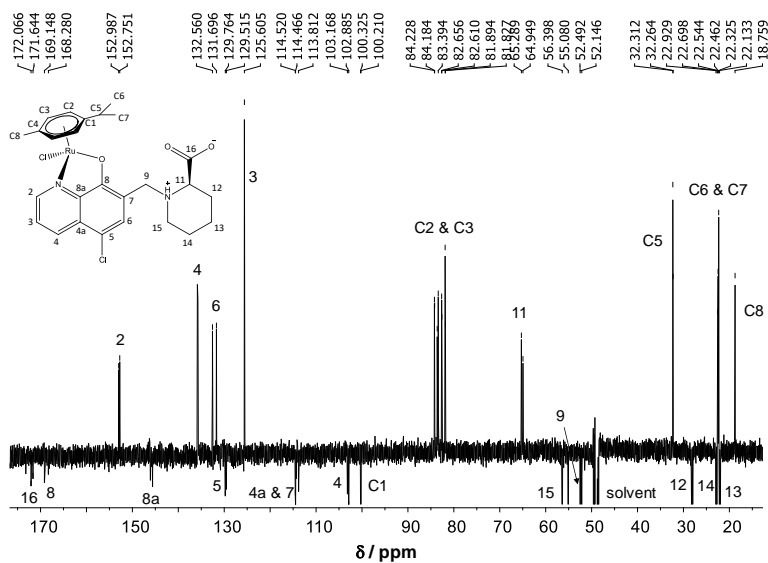

**Figure S12.**  $^{13}\text{C}$  APT NMR spectrum of  $[\text{Ru}(\eta^6\text{-}p\text{-cymene})(\text{HQCl-D-hPro})\text{Cl}]\text{Cl}$  in  $\text{CD}_3\text{OD}$ . Attached proton test method: CH and  $\text{CH}_3$  peaks are positive, C and  $\text{CH}_2$  peaks are negative. Inserted structure shows numbering of peaks.  $\{c_{\text{complex}} = 10 \text{ mM}, T = 25.0^\circ\text{C}\}$

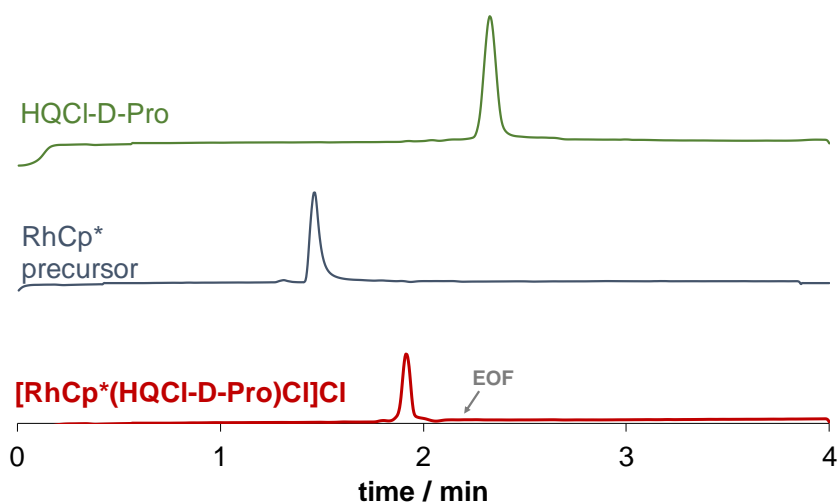

**Figure S13.** Electropherograms of the isolated complex  $[\text{RhCp}^*(\text{HQCl-D-Pro})\text{Cl}]\text{Cl}$ , the  $\text{RhCp}^*$  precursor  $[\text{RhCp}^*(\mu\text{-Cl})\text{Cl}]_2$  and ligand HQCl-D-Pro at pH 7.4.  $\{c = 500 \mu\text{M}; \text{PBS}^{\text{pH } 7.4}; \lambda = 200 \text{ nm}\}$

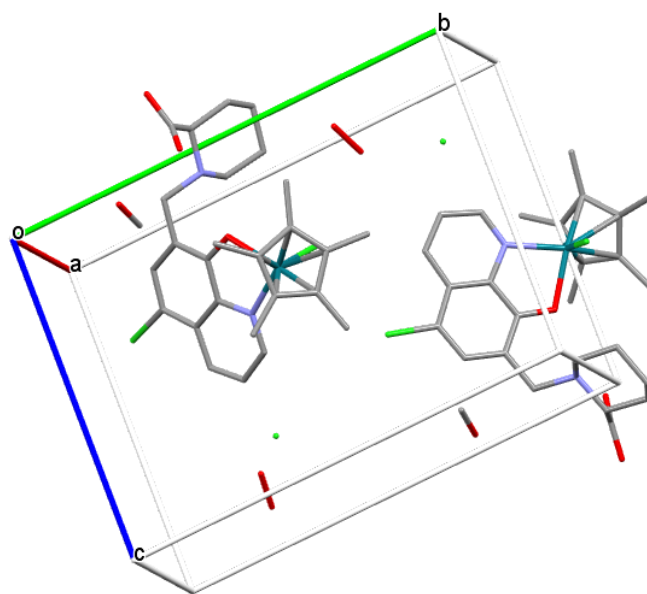

**Figure S14.** Unit cell containing two molecules in crystal (**1**).

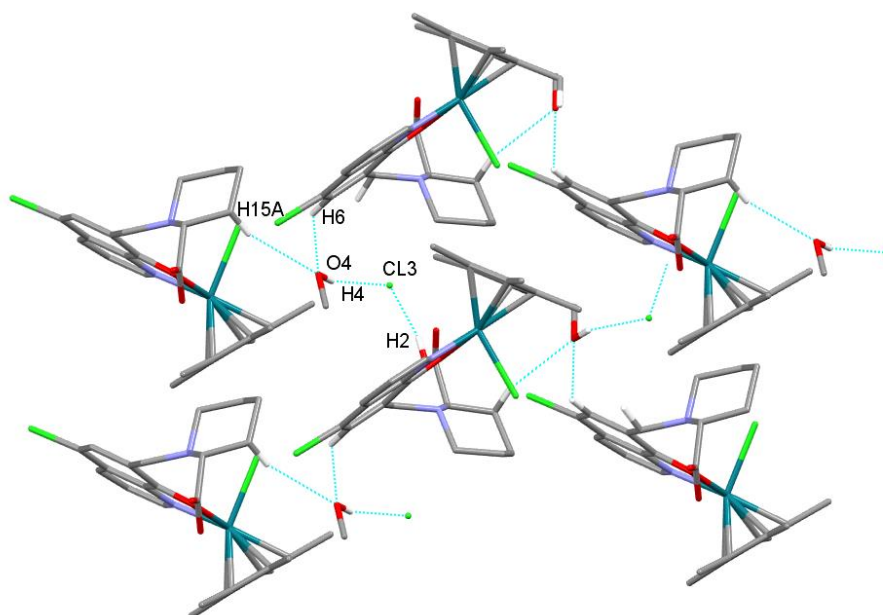

**Figure S15.** Packing arrangements in crystal (**1**) showing the C/O-H...O/Cl hydrogen bond interactions in the crystallographic direction 'b'.

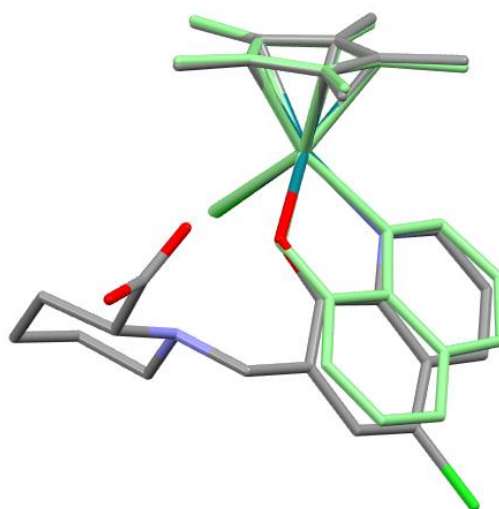

**Figure S16.** Comparison of the coordination geometry in crystal (**1**) (coloured by element) and [RhCp\*(8-hydroxyquinolinato)Cl] Ref. code GAQLES [Dömötör, O.; Pape, V. F. S.; May, N. V.; Szakács, G.; Enyedy, É. A. Comparative solution equilibrium studies of antitumor ruthenium( $\eta^6$ -*p*-cymene) and rhodium ( $\eta^5$ -C<sub>5</sub>Me<sub>5</sub>) complexes of 8-hydroxyquinolines. *Dalton Trans.* **2017**, 46, 4382-4392.] (green) with the overlay of Rh and the coordinating Cl, O and N atoms.



**Table S1.** Crystal data and structure refinement for  $[\text{Rh}(\eta^5\text{-C}_5\text{Me}_5)(\text{HQCl-D-hPro})\text{Cl}]\text{Cl}\cdot\text{H}_2\text{O}\cdot\text{CH}_3\text{OH}$  (1).

|                                        |                                                                                                                             |
|----------------------------------------|-----------------------------------------------------------------------------------------------------------------------------|
| Empirical formula                      | $\text{C}_{27}\text{H}_{36}\text{Cl}_3\text{N}_2\text{O}_5\text{Rh}$                                                        |
| Formula weight                         | 677.84                                                                                                                      |
| Temperature                            | 140(2) K                                                                                                                    |
| Radiation and wavelength               | Mo-K $\alpha$ , $\lambda = 0.71073 \text{ \AA}$                                                                             |
| Crystal system                         | monoclinic                                                                                                                  |
| Space group                            | $P 2_1$                                                                                                                     |
| Unit cell dimensions                   | $a = 7.6878(5) \text{ \AA}$<br>$b = 15.7291(10) \text{ \AA}$<br>$c = 12.9089(13) \text{ \AA}$<br>$\beta = 106.503(7)^\circ$ |
| Volume                                 | $1496.7(2) \text{ \AA}^3$                                                                                                   |
| $Z$                                    | 2                                                                                                                           |
| Density (calculated)                   | $1.504 \text{ Mg/m}^3$                                                                                                      |
| Absorption coefficient, $\mu$          | $0.876 \text{ mm}^{-1}$                                                                                                     |
| $F(000)$                               | 696                                                                                                                         |
| Crystal colour                         | yellow                                                                                                                      |
| Crystal description                    | platelet                                                                                                                    |
| Crystal size                           | $0.45 \times 0.15 \times 0.15 \text{ mm}$                                                                                   |
| Absorption correction                  | numerical                                                                                                                   |
| Max. and min. transmission             | 0.909, 0.975                                                                                                                |
| $\theta$ -range for data collection    | $3.052^\circ \leq \theta \leq 27.466^\circ$                                                                                 |
| Index ranges                           | $-9 \leq h \leq 9; -20 \leq k \leq 20; -16 \leq l \leq 16$                                                                  |
| Reflections collected                  | 45948                                                                                                                       |
| Completeness to $2\theta$              | 0.998                                                                                                                       |
| Absolute structure parameter           | 0.034(14)                                                                                                                   |
| Friedel coverage                       | 0.929                                                                                                                       |
| Friedel fraction max.                  | 0.995                                                                                                                       |
| Friedel fraction full                  | 0.999                                                                                                                       |
| Independent reflections                | 6809 [ $R(\text{int}) = 0.0923$ ]                                                                                           |
| Reflections $I > 2\sigma(I)$           | 5846                                                                                                                        |
| Refinement method                      | full-matrix least-squares on $F^2$                                                                                          |
| Data / restraints / parameters         | 6809 / 1 / 361                                                                                                              |
| Goodness-of-fit on $F^2$               | 0.994                                                                                                                       |
| Final $R$ indices [ $I > 2\sigma(I)$ ] | $R1 = 0.0397, wR2 = 0.0688$                                                                                                 |
| $R$ indices (all data)                 | $R1 = 0.0524, wR2 = 0.0717$                                                                                                 |
| Max. and mean shift/esd                | 0.000; 0.000                                                                                                                |
| Largest diff. peak and hole            | 0.674; -0.783 $\text{e.\AA}^{-3}$                                                                                           |

**Table S2.** Selected bond lengths (Å) and angles (°) in crystal (1).

| Bond               | Distance (Å) | Bond                         | Angle (°)  |
|--------------------|--------------|------------------------------|------------|
| Rh1-O1             | 2.104(4)     | O1-Rh1-N1                    | 78.7(2)    |
| Rh1-C23            | 2.126(6)     | O1-Rh1-Cl2                   | 86.0(2)    |
| Rh1-C21            | 2.132(6)     | N1-Rh1-Cl2                   | 87.4(14)   |
| Rh1-C22            | 2.153(6)     | Cl2-Rh1-Cg                   | 128.14(11) |
| Rh1-N1             | 2.118(5)     | N1-Rh-Cg                     | 134.13(17) |
| Rh1-C24            | 2.129(5)     | O1-Rh-Cg                     | 125.37(14) |
| Rh1-C20            | 2.148(5)     | C8-C7-C10-N2                 | 43.1(4)    |
| Rh1-Cl2            | 2.398(2)     | Cp* - HQ <sup>b</sup>        | 57.6(4)    |
| Rh-Cg <sup>a</sup> | 1.758(3)     | HQ - piperidine <sup>b</sup> | 72.5(4)    |

<sup>a</sup> Cg is the centre of gravity of the Cp\* ring. <sup>b</sup> Dihedral angle calculated between two ring planes.

**Table S3.** Hydrogen-bond geometry of crystal (1).

| D-H...A        | D-H (Å) | H...A(Å) | D...A(Å)  | D-H...A (°) | symmetry codes |
|----------------|---------|----------|-----------|-------------|----------------|
| C11-H2A...O1   | 0.82    | 2.02     | 2.672(6)  | 131         | intra          |
| O2-H2...Cl3    | 0.82    | 2.16     | 2.953(5)  | 164         | -1+x,y,z       |
| O4-H4...Cl3    | 0.82    | 2.37     | 3.149(7)  | 167         |                |
| C6-H6...O4     | 0.93    | 2.52     | 3.283(9)  | 140         | -1+x,y,z       |
| C10-H10B...O5B | 0.97    | 2.30     | 3.15(4)   | 146         | -x,1/2+y,-z    |
| C12-H12B...Cl3 | 0.97    | 2.76     | 3.650(8)  | 152         | -1+x,y,z       |
| C13-H13B...O5B | 0.97    | 2.57     | 3.33(4)   | 135         |                |
| C15-H15A...O4  | 0.97    | 2.58     | 3.423(11) | 145         | 1-x,-1/2+y,-z  |
| C25-H25B...Cl3 | 0.96    | 2.80     | 3.705(8)  | 157         | x,y,1+z        |
| C29-H29C...Cl2 | 0.96    | 2.73     | 3.531(8)  | 141         | 1+x,y,z        |

**Table S4.** Gated events (%) in Colo-205 cells measured by flow cytometry. {3 h induction time}

| name                       | concentration | gated events %    |                               |              |
|----------------------------|---------------|-------------------|-------------------------------|--------------|
|                            |               | early apoptosis % | late apoptosis and necrosis % | cell death % |
| control: M627 <sup>a</sup> | 10 $\mu$ M    | 5.27              | 16.8                          | 15.2         |
| control: M627 <sup>a</sup> | 20 $\mu$ M    | 21.7              | 36.2                          | 20.9         |
| control: cisplatin         | 15 $\mu$ M    | 1.06              | 4.70                          | 3.18         |
| HQCl-D-hPro                | 25 $\mu$ M    | 0.987             | 9.10                          | 27.5         |
| RhCp*–HQCl-D-hPro          | 25 $\mu$ M    | 0.838             | 7.50                          | 20.7         |
| RuCym–HQCl-D-Pro           | 25 $\mu$ M    | 0.288             | 5.37                          | 27.9         |

<sup>a</sup> M627: 12*H*-benzo[ $\alpha$ ]phenothiazine.

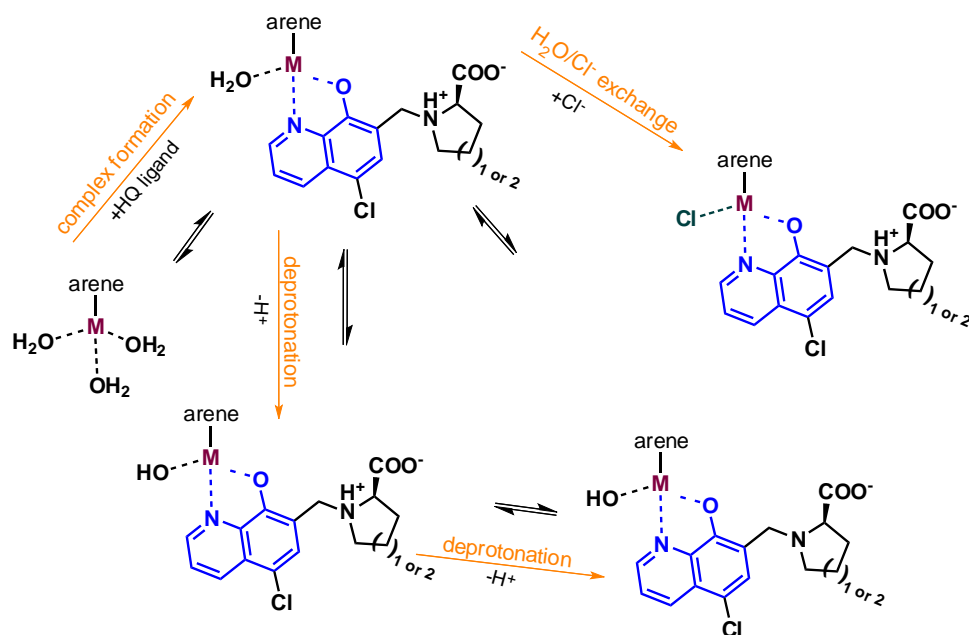

**Scheme S1.** Equilibrium processes for the formation, deprotonation and water/chloride co-ligand exchange of the RhCp\* and RuCym complexes of the amino acid-8-hydroxyquinoline hybrids.

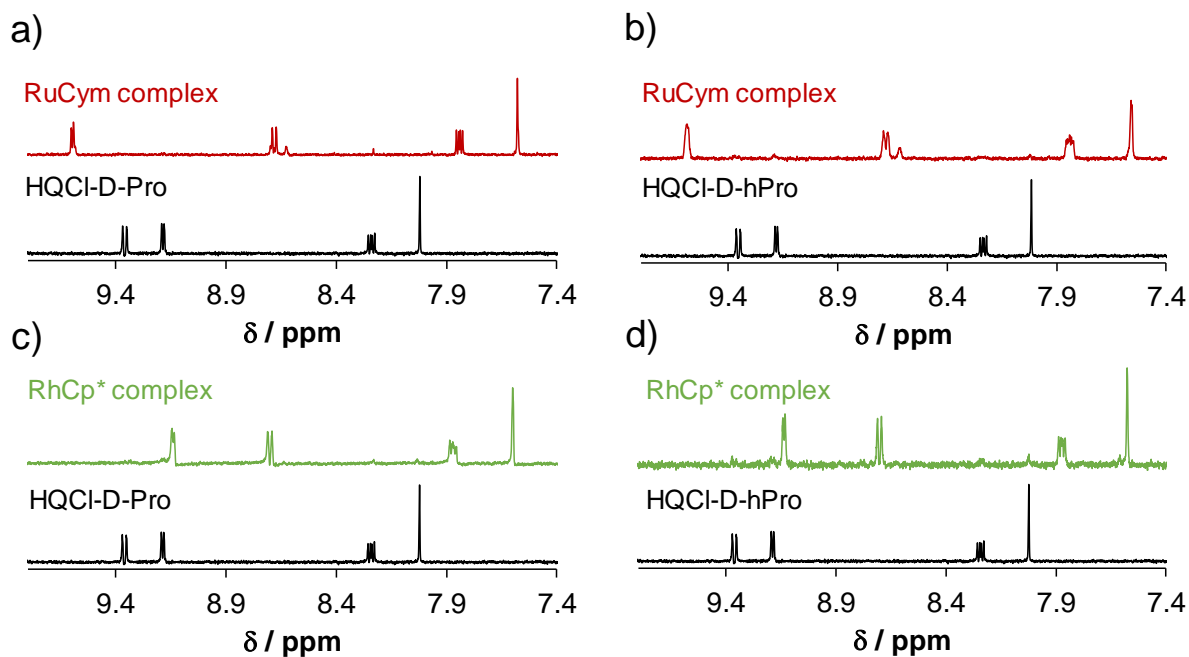

**Figure S17.**  $^1\text{H}$  NMR spectra of a)  $[\text{RuCym}(\text{HQCl-D-Pro})\text{Cl}]\text{Cl}$ , b)  $[\text{RuCym}(\text{HQCl-D-hPro})\text{Cl}]\text{Cl}$ , c)  $[\text{RhCp}^*(\text{HQCl-D-Pro})\text{Cl}]\text{Cl}$  and d)  $[\text{RhCp}^*(\text{HQCl-D-hPro})\text{Cl}]\text{Cl}$  at pH 0.70 in the low-field region in comparison to the spectra of the ligands.  $\{c = 500 \mu\text{M}; 10\% \text{ (v/v) } \text{D}_2\text{O}; 24 \text{ h}\}$

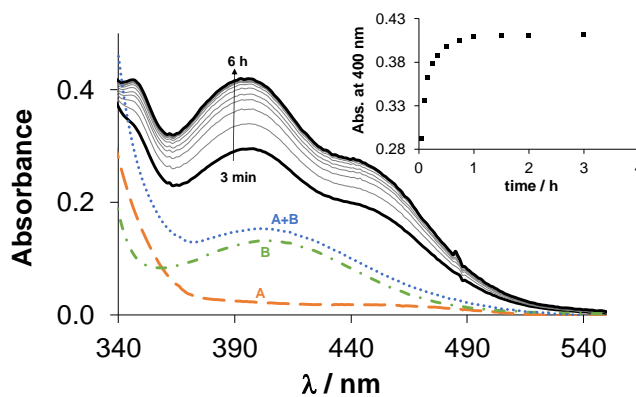

**Figure S18.** Time-dependent UV-vis spectra of the RuCym – HQCl-D-Pro (1:1) system (solid lines), spectra of  $[\text{RuCym}(\text{H}_2\text{O})_3]^{2+}$  (B, dash-dotted line), ligand (A, dashed line) and with their summed spectra (A+B, dotted line) at pH = 4.06. Inserted figure shows the absorbance changes at 400 nm plotted against the time.  $\{c_{\text{RuCym}} = c_{\text{ligand}} = 120 \mu\text{M}; I = 0.2 \text{ M KNO}_3; \text{pH} = 4.06; T = 25.0 \text{ }^\circ\text{C}; \ell = 1 \text{ cm}\}$

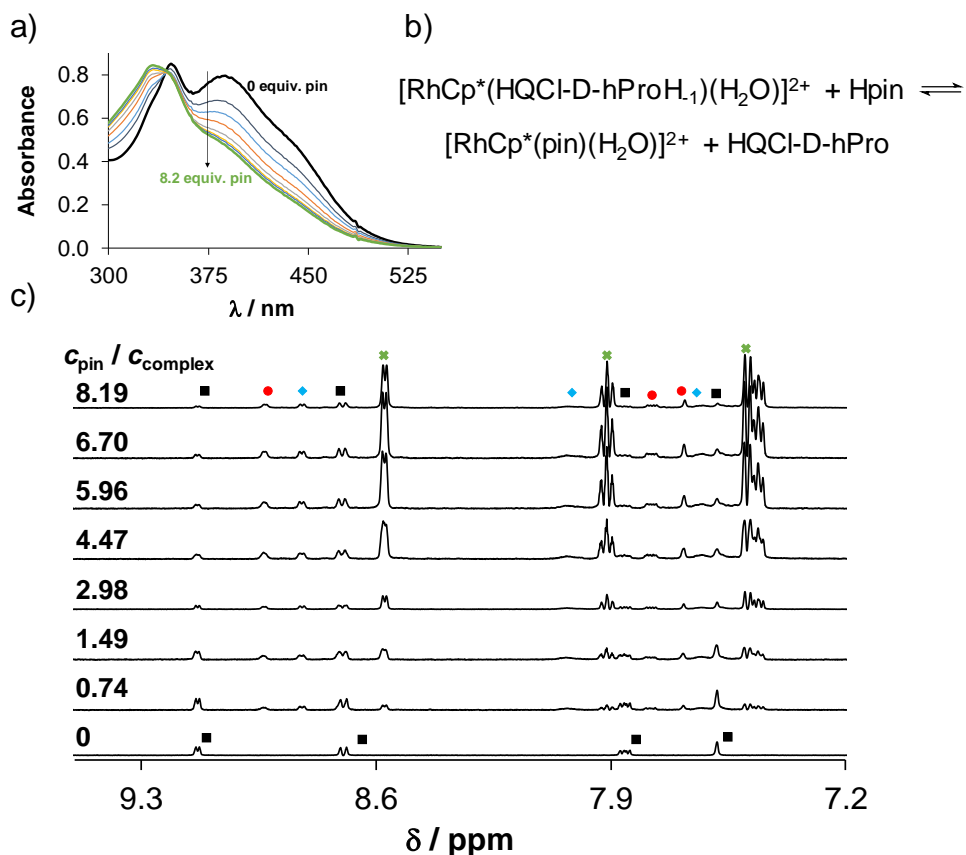

**Figure S19.** a) UV-vis spectra of RhCp\* – HQCl-D-hPro – 2-picolylamine (pin) system at various pin-to-complex ratios in chloride ion free medium using 24 h equilibration time. b) Equilibrium process for the competition reaction. c)  $^1\text{H}$  NMR spectra recorded for the same samples used for UV-vis experiments. Symbols: ■:  $[\text{RhCp}^*(\text{HQCl-D-hPro})(\text{H}_2\text{O})]^{2+}$  complex, ●: free HQCl-D-hPro ligand, ◆:  $[\text{RhCp}^*(\text{pin})(\text{H}_2\text{O})]^{2+}$  complex, ✱: free pin.  $\{c_{\text{RhCp}^*} = c_{\text{HQCl-D-hPro}} = 184 \mu\text{M}; c_{\text{pin}} = 0 - 1.522 \text{ mM}; I = 0.2 \text{ M KNO}_3; T = 25.0 \text{ }^\circ\text{C}; 10\% \text{ (v/v) D}_2\text{O}; \text{pH} = 7.4 \text{ (20 mM phosphate buffer)}; \ell = 1 \text{ cm}\}$

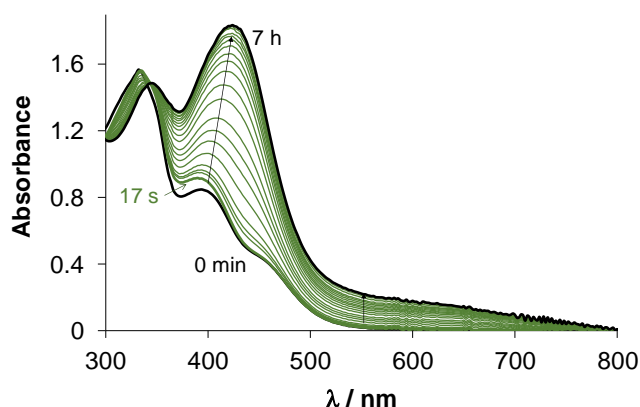

**Figure S20.** Time-dependent UV-vis spectra of the RuCym–HQCl-D-Pro complex in the presence of 2 equiv. HQCl-D-Pro at pH = 7.40.  $\{c_{\text{complex}} = 200 \mu\text{M}; c_{\text{HQCl-D-Pro}} = 400 \mu\text{M}; I = 0.2 \text{ M KNO}_3; \text{pH} = 7.40 \text{ (20 mM phosphate buffer)}; T = 25.0 \text{ }^\circ\text{C}; \ell = 1 \text{ cm}\}$

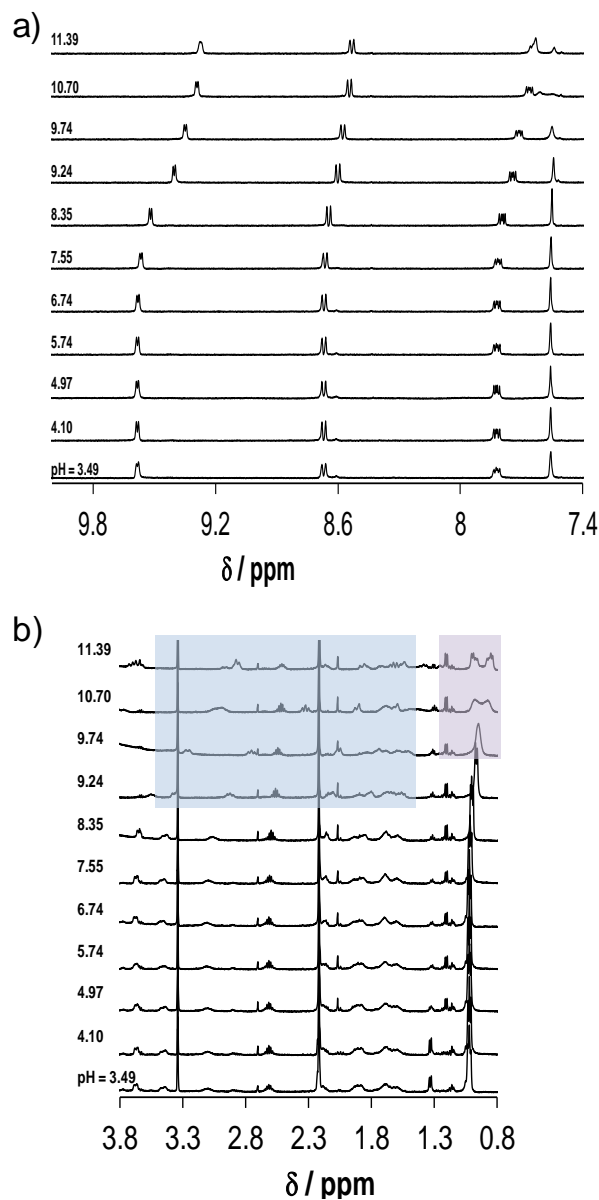

**Figure S21.**  $^1\text{H}$  NMR spectra of the RuCym – HQCl-D-Pro (1:1) system at various pH values in the a) high-field and the b) low-field regions. Peaks in a) belong to the aromatic CH protons of the 8-hydroxyquinoline scaffold. Peaks in b) in the blue box show the changes of the proline  $\text{CH}_2$  protons, and yellow box indicate the loss of symmetry of the *p*-cymene  $\text{CH}_3$  groups.  $\{c_{\text{RuCym}} = c_{\text{ligand}} = 500 \mu\text{M}; I = 0.2 \text{ M KNO}_3; 10\% \text{ (v/v) D}_2\text{O}; T = 25.0 \text{ }^\circ\text{C}\}$

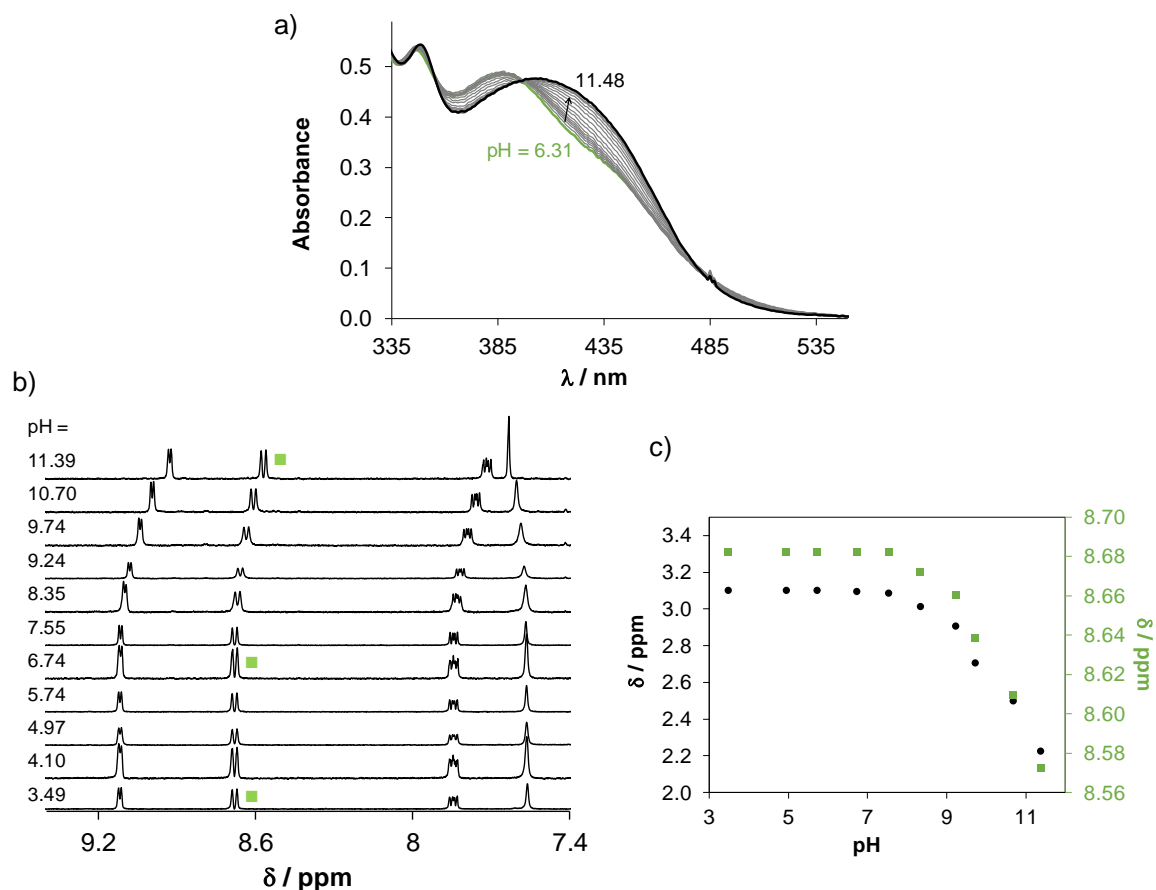

**Figure S22.** a) UV-vis spectra of the RhCp\* – HQCl-D-hPro (1:1) system at various pH values. b).  $^1\text{H}$  NMR spectra at various pH values in the high-field region, and c) chemical shifts of  $\text{C}^4\text{H}$  of the 8-hydroxyquinoline scaffold (■) and  $\text{C}^{15}\text{H}$  of the hPro moiety.  $\{c_{\text{RhCp}^*} = c_{\text{ligand}} = 111 \mu\text{M}$  (UV-vis;  $\ell = 1 \text{ cm}$ ) or  $500 \mu\text{M}$  (NMR, with 10% (v/v)  $\text{D}_2\text{O}$ );  $I = 0.2 \text{ M KNO}_3$ ;  $T = 25.0 \text{ }^\circ\text{C}\}$

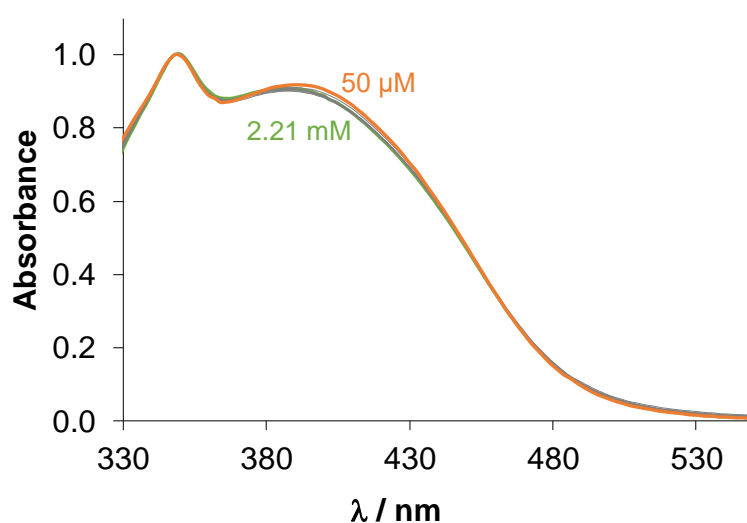

**Figure S23.** Normalized UV-vis spectra of the RhCp\* – HQCl-D-Pro complex measured at various concentrations and path lengths.  $\{c_{\text{RhCp}^*} = c_{\text{ligand}} = 50 - 2210 \mu\text{M}$ ;  $\ell = 1 - 50 \text{ mm}$ ;  $\text{pH} = 11.0$ ;  $T = 25.0 \text{ }^\circ\text{C}\}$

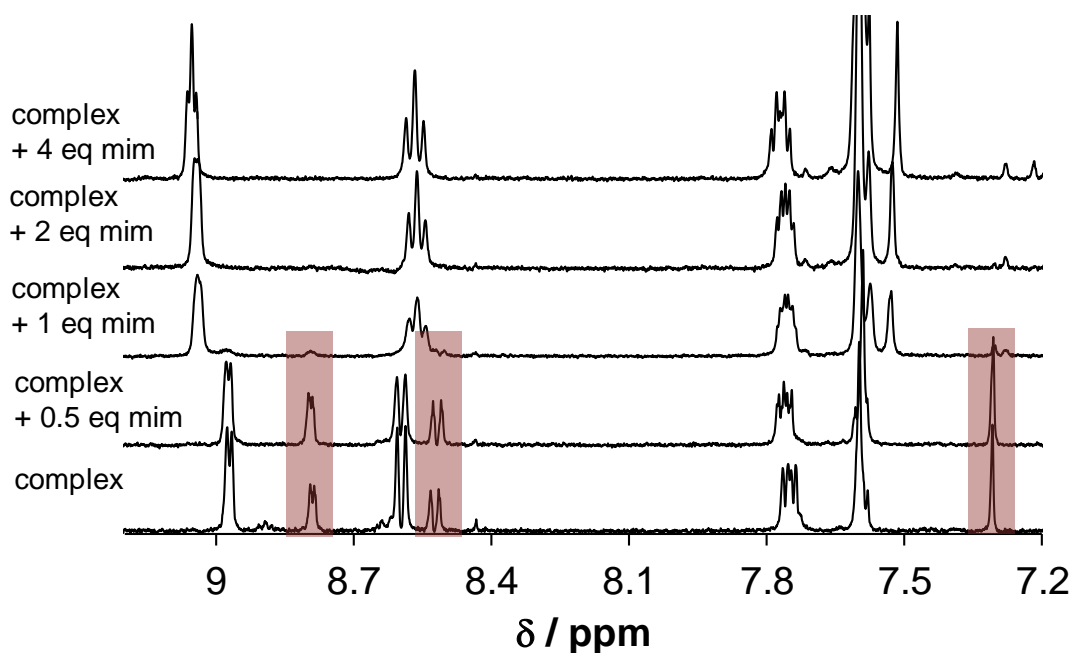

**Figure S24.**  $^1\text{H}$  NMR spectra of the  $\text{RhCp}^*\text{-HQCl-D-Pro}$  complex with various equivalents of *N*-methylimidazole (mim). Red boxes indicate the peaks assigned to the dimeric  $\text{RhCp}^* - \text{HQCl-D-Pro}$  species.  $\{c_{\text{RhCp}^*} = c_{\text{ligand}} = 500 \mu\text{M}$  (NMR, with 10% (v/v)  $\text{D}_2\text{O}$ );  $\text{pH} = 11.0$ ;  $I = 0.2 \text{ M KNO}_3$ ;  $T = 25.0 \text{ }^\circ\text{C}\}$

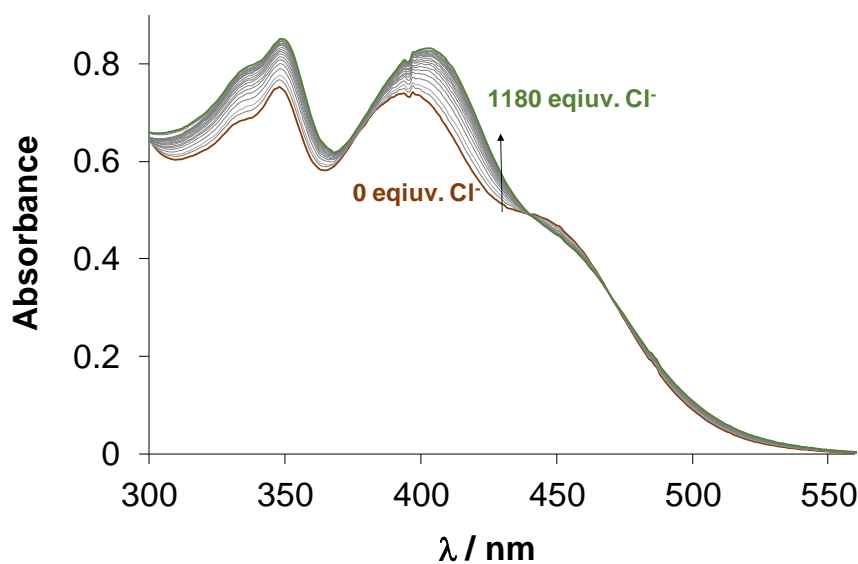

**Figure S25.** UV-vis spectra of the  $\text{RhCp}^*\text{-HQCl-D-hPro}$  complex at  $\text{pH} 7.4$  measured at various chloride ion concentrations.  $\{c_{\text{RhCp}^*} = c_{\text{ligand}} = 210 \mu\text{M}$ ;  $\ell = 1 \text{ cm}$ ;  $\text{pH} = 7.4$  (20 mM phosphate buffer);  $T = 25.0 \text{ }^\circ\text{C}\}$



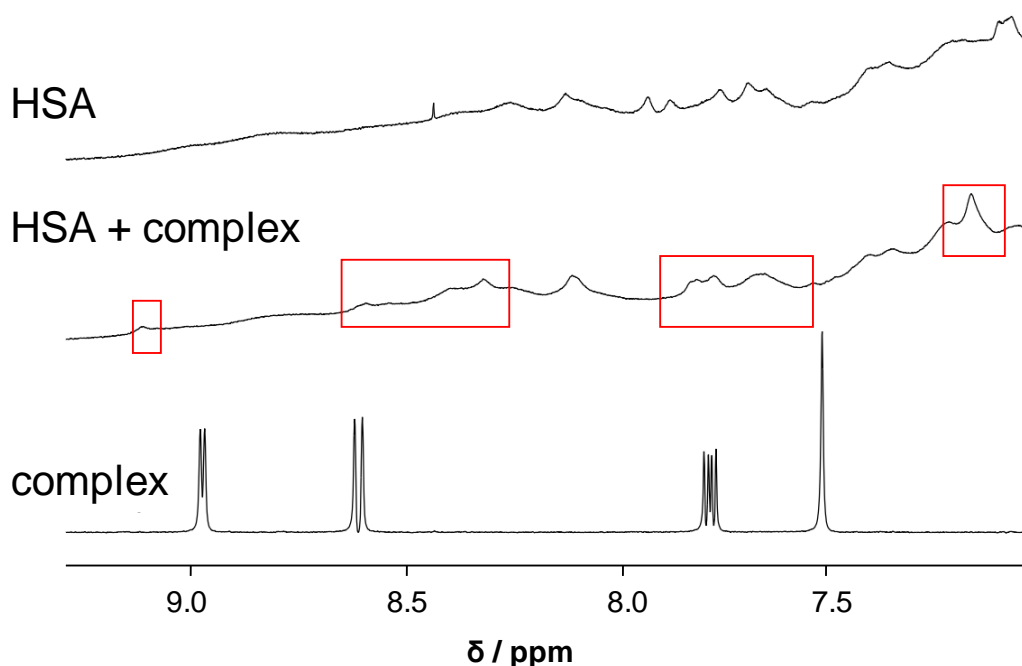

**Figure S26.**  $^1\text{H}$  NMR spectra of HSA, the RhCp\*–HQCl-D-Pro complex and their mixtures. Red boxes indicate the peaks assigned to the bound complexes.  $\{c_{\text{complex}} = 1 \text{ mM}; c_{\text{HSA}} = 0.5 \text{ mM}; 10\% \text{ (v/v) D}_2\text{O}; \text{pH} = 7.4 \text{ (PBS')} ; T = 25.0 \text{ }^\circ\text{C}\}$

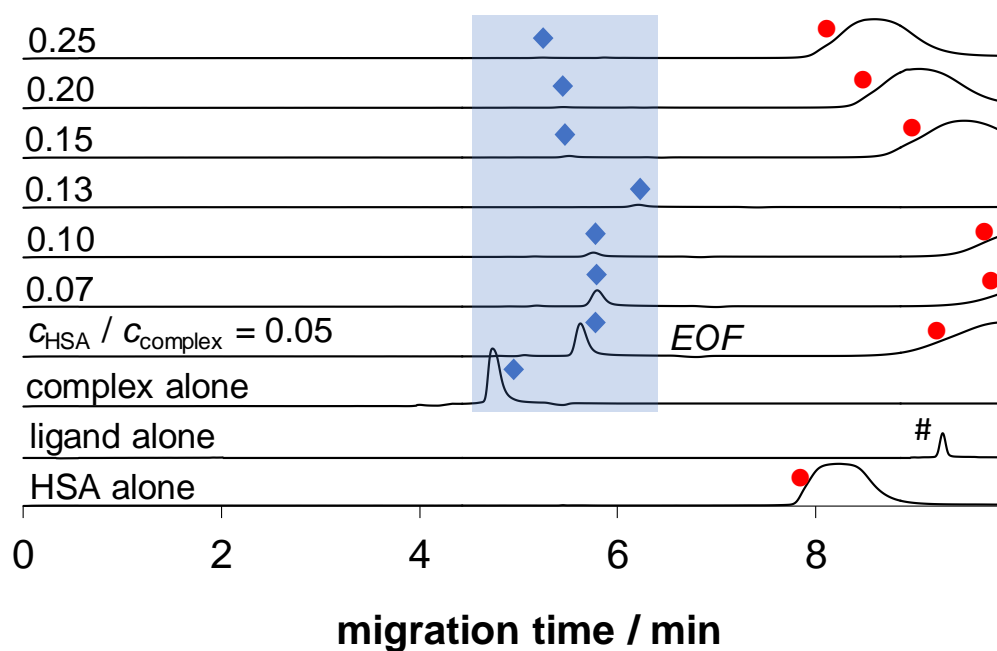

**Figure S27.** Electropherograms of HSA alone and in the presence of various equivalents of RuCym–HQCl-D-Pro complex (0.05 – 0.25). Symbols are indicating the free complex (♦), HSA & HSA-complex adduct (●), free ligand (#) and electroosmotic flow (EOF). Migration time of the free complex is in the range of 5.6 – 6.2 min, and peaks belonging to the free complex were assigned based on their UV-vis spectra measured at the peak maxima.  $\{c_{\text{HSA}} = 50 \text{ } \mu\text{M}, c_{\text{complex}} = 250 - 1000 \text{ } \mu\text{M}; \text{pH} = 7.40 \text{ (PBS' buffer)}; \lambda = 200 \text{ nm}; T = 25.0 \text{ }^\circ\text{C}\}$

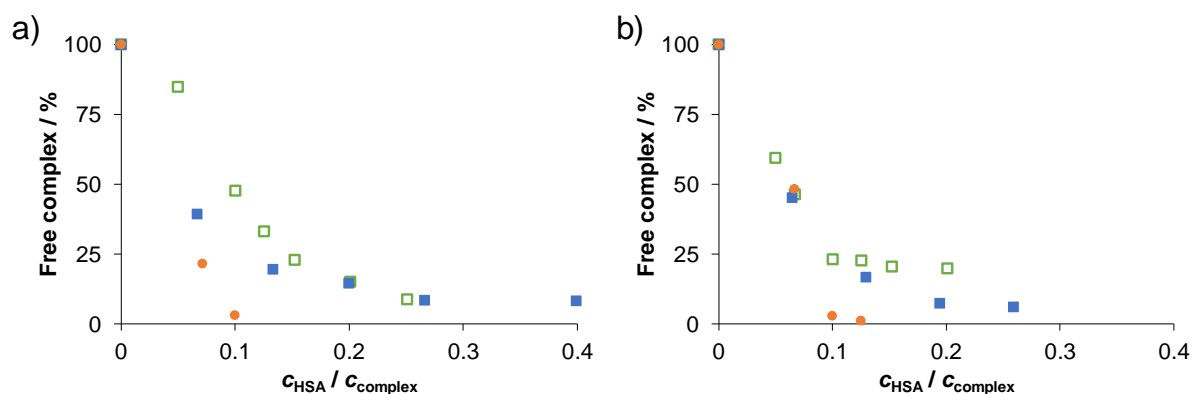

**Figure S28.** Molar fractions of the unbound a) RhCp\* and b) RuCym complexes plotted against  $c_{\text{HSA}} / c_{\text{complex}}$  ratio calculated on the basis of the CZE measurements. The concentration of the free complex was determined using external calibration. Symbols for the ligands in the complexes: HQCl-D-Pro ( $\square$ ), HQCl-L-Pro ( $\blacksquare$ ) and HQCl-D-hPro ( $\bullet$ ).  $\{c_{\text{HSA}} = 50 \mu\text{M}, c_{\text{complex}} = 250 - 1000 \mu\text{M}; \text{pH} = 7.40 \text{ (PBS' buffer)}\}$

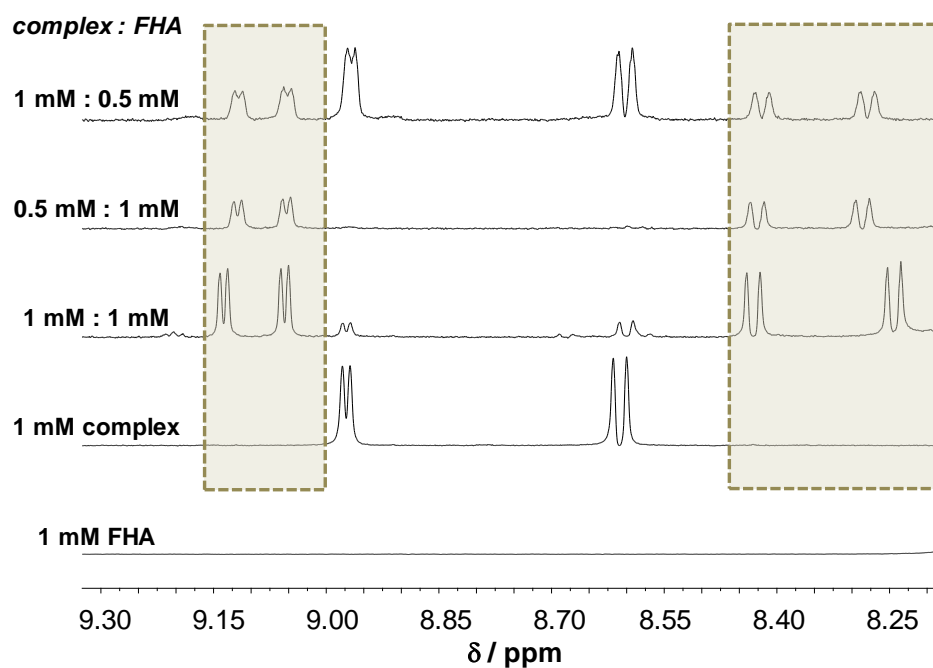

**Figure S29.**  $^1\text{H}$  NMR spectra recorded for FHA, for the RhCp\*–HQCl-D-hPro complex and their various mixtures. Framed boxes show the peaks of the forming ternary complex.  $\{10\% \text{ (v/v) } \text{D}_2\text{O}; \text{pH} = 7.40 \text{ (PBS' buffer)}\}$

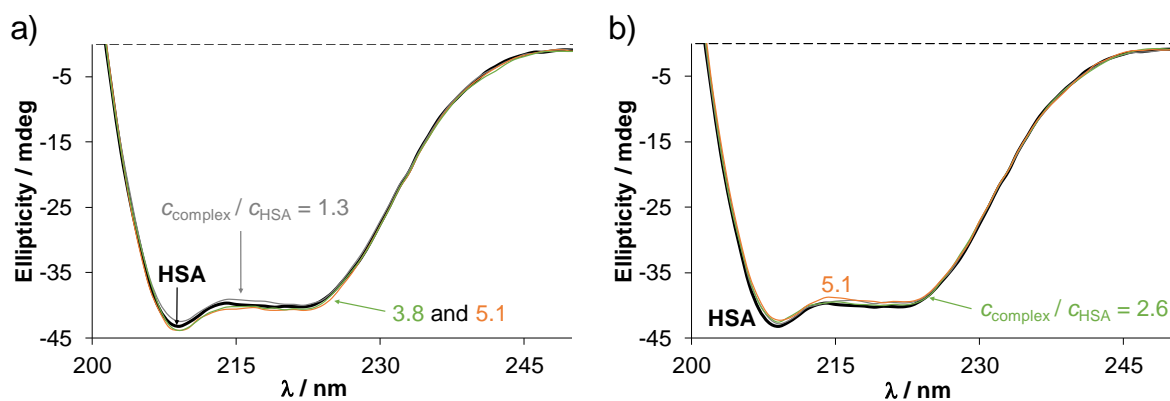

**Figure S30.** CD spectra of HSA in the absence and presence of various equiv. a) RhCp\*–D-HQCl–hPro and b) RuCym–D-HQCl–hPro complex. The %  $\alpha$ -helix content of HSA was decreased from 50% to 47% or 46% in the case of the RhCp\* and RuCym complex, respectively based on the calculation suggested by Micsonai *et al.* [Micsonai, A.; Wien, F.; Kernya, L.; Lee, Y.-H.; Goto, Y.; Réfrégiers, M.; Kardos, J. Accurate secondary structure prediction and fold recognition for circular dichroism spectroscopy. *Proc. Natl. Acad. Sci.* **2015**, 112, E3095-E3103]. { $c_{\text{complex}} = 0 - 10.2 \mu\text{M}$ ,  $c_{\text{HSA}} = 2 \mu\text{M}$ , pH = 7.40 (PBS' buffer);  $\ell = 0.2 \text{ cm}$ }

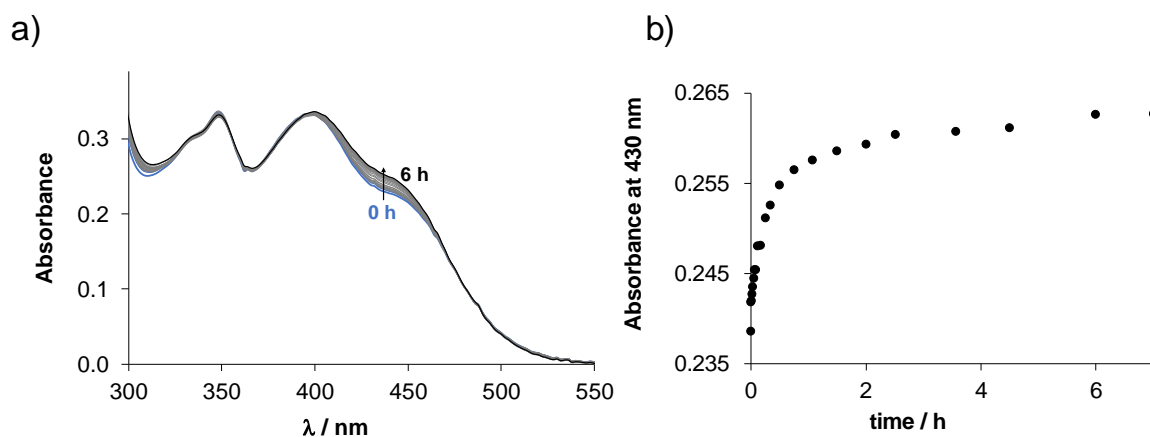

**Figure S31.** a) Time-dependent UV-vis spectra of RuCym-HQCl-D-hPro – ct-DNA system. b) Absorbance values at 430 nm as a function of time. { $c_{\text{complex}} = 100 \mu\text{M}$ ,  $c_{\text{ct-DNA}} = 200 \mu\text{M}$ ,  $c_{\text{KCl}} = 4 \text{ mM}$ ; pH = 7.40 (20 mM phosphate buffer);  $\ell = 1 \text{ cm}$ }

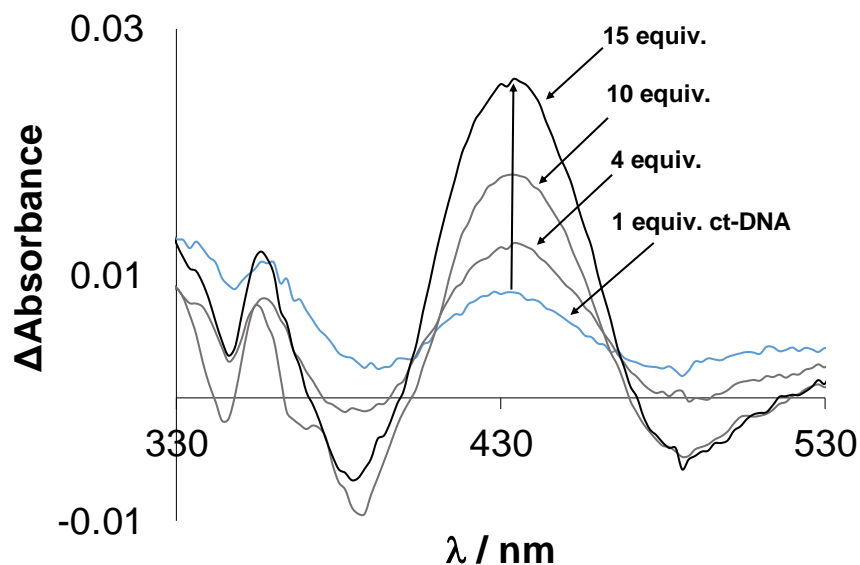

**Figure S32.** UV-vis difference spectra of RuCym-HQCl-L-Pro complex in the presence of various equiv. ct-DNA (difference spectrum = spectrum of the complex with ct-DNA – spectra of the complex and the ct-DNA alone).  $\{c_{\text{complex}} = 88 \mu\text{M}$ ,  $c_{\text{ct-DNA}} = 0 - 1.75 \text{ mM}$ ,  $c_{\text{KCl}} = 4 \text{ mM}$ ; pH = 7.40 (20 mM phosphate buffer);  $\ell = 1 \text{ cm}\}$

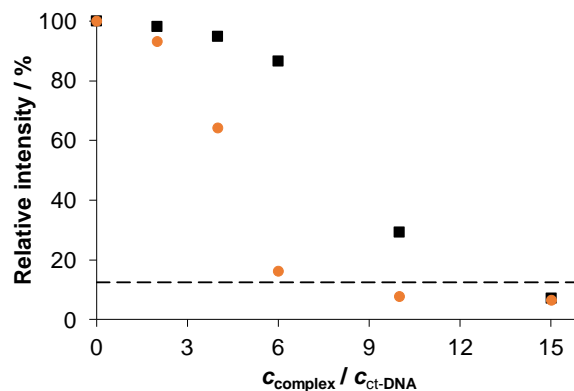

**Figure S33.** Relative fluorescence intensity of ct-DNA-EB followed at 605 nm for the complexes RhCp\*-HQCl-D-hPro (●) and RuCym-HQCl-D-hPro (■). Dashed line denotes the relative intensity of the free EB.  $\{c_{\text{ct-DNA}} = 20 \mu\text{M}$ ,  $c_{\text{EB}} = 5 \mu\text{M}$ ,  $c_{\text{complex}} = 0 - 300 \mu\text{M}$ ,  $\lambda_{\text{EX}} = 510 \text{ nm}$ ,  $c_{\text{KCl}} = 4 \text{ mM}$ ; pH = 7.40 (20 mM phosphate buffer);  $\ell = 1 \text{ cm}\}$

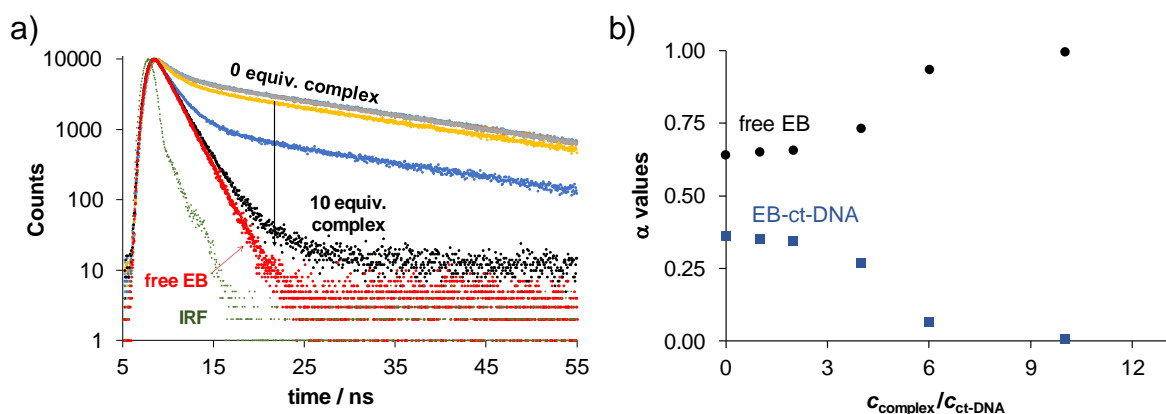

**Figure S34.** a) Fluorescence emission decay curves of ct-DNA – EB system at various equiv. RhCp\*–HQCl-D-hPro, and instrument response function (IRF). b) Amplitudes ( $\alpha$ ) calculated at different  $c_{\text{complex}} / c_{\text{DNA}}$  ratios for the RhCp\*–HQCl-D-hPro – DNA – EB system.  $\{c_{\text{ct-DNA}} = 20 \mu\text{M}, c_{\text{EB}} = 5 \mu\text{M}, c_{\text{complex}} = 0 - 300 \mu\text{M}, \lambda_{\text{EX}} = 460 \text{ nm}, \lambda_{\text{EM}} = 610 \text{ nm}; c_{\text{KCl}} = 4 \text{ mM}; \text{pH} = 7.40 (20 \text{ mM phosphate buffer}); \ell = 1 \text{ cm}\}$

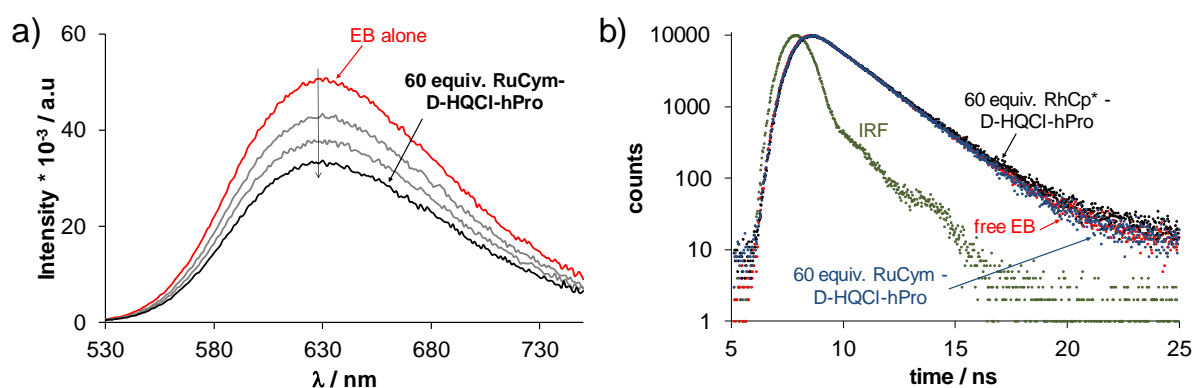

**Figure S35.** a) Fluorescence emission spectra of EB alone and in the presence of the RuCym–D-HQCl-hPro complex. b) Fluorescence emission decay curves of EB in the absence and presence of the indicated HQCl-D-hPro complexes and the instrument response function (IRF).  $\{c_{\text{EB}} = 5 \mu\text{M}, c_{\text{complex}} = 0 - 300 \mu\text{M}, \lambda_{\text{EX}} = 510 \text{ nm (steady-state)}, \lambda_{\text{EX}} = 460 \text{ nm}, \lambda_{\text{EM}} = 610 \text{ nm (lifetime)}, c_{\text{KCl}} = 4 \text{ mM}; \text{pH} = 7.40 (20 \text{ mM phosphate buffer}); \ell = 1 \text{ cm}\}$

**Table S5.** Calculated fluorescence decay parameters [lifetime ( $\tau_i$ ) / ns; amplitude ( $\alpha_i$ ) and average lifetime ( $\tau_{ave}$ ) / ns] for complex–ct-DNA–EB systems in addition to fitting parameters ( $\chi^2$ ). { $c_{ct-DNA}$  = 20  $\mu$ M,  $c_{EB}$  = 5  $\mu$ M,  $c_{complex}$  = 0 – 300  $\mu$ M,  $l$  = 1 cm,  $\lambda_{EX}$  = 460 nm,  $\lambda_{EM}$  = 610 nm,  $c_{KCl}$  = 4 mM; pH = 7.40 (20 mM phosphate buffer);  $\ell$  = 1 cm}

|                          |       | $\tau_1$ | $\tau_2$           | $\tau_{ave}$ | $\alpha_1$ | $\alpha_2$ | $\chi^2$          |
|--------------------------|-------|----------|--------------------|--------------|------------|------------|-------------------|
| EB                       |       | 1.56     | -                  | 1.56         | 1          | -          | 1.26              |
| EB–ct-DNA                |       | 1.69     | 21.74              | 8.89         | 0.641      | 0.359      | 1.04              |
| $c_{complex}/c_{ct-DNA}$ |       |          |                    |              |            |            |                   |
| RhCp*–HQCl-D-hPro        | 1.00  | 1.67     | 21.76              | 8.69         | 0.651      | 0.349      | 1.07              |
|                          | 2.00  | 1.65     | 21.58              | 8.51         | 0.656      | 0.344      | 1.06              |
|                          | 4.01  | 1.64     | 21.44              | 6.96         | 0.731      | 0.269      | 1.08              |
|                          | 6.01  | 1.60     | 20.42              | 2.83         | 0.935      | 0.065      | 1.22 <sup>b</sup> |
|                          | 10.02 | 1.59     | 21.27 <sup>a</sup> | 1.69         | 0.995      | 0.005      | 1.23 <sup>b</sup> |
| RuCym–HQCl-D-hPro        | 1.00  | 1.67     | 21.78              | 8.80         | 0.645      | 0.355      | 1.04              |
|                          | 2.00  | 1.63     | 21.53              | 8.47         | 0.656      | 0.344      | 1.05              |
|                          | 4.01  | 1.63     | 21.37              | 8.42         | 0.656      | 0.344      | 1.08              |
|                          | 6.01  | 1.66     | 21.15              | 8.17         | 0.666      | 0.334      | 1.08              |
|                          | 10.02 | 1.59     | 19.99              | 3.13         | 0.916      | 0.084      | 1.11              |
|                          | 15.03 | 1.57     | -                  | 1.57         | 1.000      | 0.000      | 1.23 <sup>b</sup> |

<sup>a</sup> It was kept constant.

<sup>b</sup>  $\chi^2$  values are considerably higher at the indicated complex/ct-DNA ratios. This phenomenon is due to the decrease of intercalated EB quantity, which results in relatively higher noise levels over the analyzed time window.
